# **A Novel Cre-Enabled Tetracycline Inducible transgenic system for tissue specific cytokine expression in the zebrafish: CETI-PIC3**

Sara Ibrahim<sup>1,2</sup>, Arianna Harris-Kawano<sup>2</sup>, Isra Haider<sup>2</sup>, Raghavendra G. Mirmira MD PhD<sup>1-6</sup>, Emily K. Sims MD<sup>2,3</sup>, and Ryan M. Anderson PhD<sup>2,3,6</sup>

From the Departments of <sup>1</sup>Biochemistry and Molecular Biology, <sup>2</sup>Center for Diabetes and Metabolic Diseases, <sup>3</sup>Pediatrics, <sup>4</sup>Cellular and Integrative Physiology, <sup>5</sup>Medicine, Indiana University School of Medicine, Indianapolis, IN 46202, <sup>6</sup>Kovler Diabetes Center and Department of Medicine, The University of Chicago, Chicago, IL 60637

**Correspondence:** Ryan M. Anderson, University of Chicago, 900 E. 57th Street, #3220, Chicago, IL 60637 E-mail: ryananderson@uchicago.edu or Emily K. Sims, Indiana University School of Medicine, 635 Barnhill Drive MS 2031E, Indianapolis, IN, USA; Tel: (317) 944-3889; Fax (317) 944-3882, E-mail: eksims@iu.edu

**Disclosure:** The authors report no conflicts of interest in this work.

## Abstract

Maladaptive signaling by pro-inflammatory cytokines (PICs) such as Tumor Necrosis Factor  $\alpha$  (TNF $\alpha$ ), Interleukin-1 $\beta$  (IL1 $\beta$ ), and Interferon  $\gamma$  (IFN $\gamma$ ), can activate downstream signaling cascades that are implicated in the development and progression of multiple inflammatory diseases. Despite playing critical roles in pathogenesis, the availability of *in vivo* models in which to model tissue-specific induction of PICs is limited. To bridge this gap, we have developed a novel multi-gene expression system dubbed: Cre-Enabled and Tetracycline-Inducible transgenic system for conditional, tissue-specific expression of Pro-Inflammatory Cytokines (CETI-PIC3). This binary transgenic system permits the stoichiometric co-expression of TNF $\alpha$ , IL1 $\beta$ , IFN $\gamma$ , and an H2B-GFP fluorescent reporter gene in a dose dependent manner. Furthermore, cytokine mis-expression is enabled only in tissue domains that can be defined by Cre recombinase expression. We have validated this system in zebrafish using an *insulin:cre* line. In doubly transgenic fish, quantitative real-time polymerase chain reaction (qRT-PCR) demonstrated increased expression levels of IFN $\gamma$ , IL1 $\beta$ , and TNF $\alpha$  mRNA. Moreover, specific expression in pancreatic  $\beta$  cells was demonstrated by both TNF- $\alpha$  immunofluorescence and GFP fluorescence. Cytokine-overexpressing islets elicited specific responses:  $\beta$  cells exhibited increased expression of genes associated with reactive oxidative species (ROS)- mediated stress and endoplasmic reticulum (ER) stress, surveilling and infiltrating macrophages were increased, and  $\beta$  cell death was promoted. This powerful and versatile model system can be used for modeling, analysis, and therapy development of diseases with an underlying inflammatory etiology.

## A. Introduction

Pro-inflammatory cytokines (PICs) are signaling molecules that are primarily produced by immune cells, including activated macrophages and T cells, that coordinate and amplify certain immune responses. Dysregulated PIC activity is also involved in several disease processes such as cell injury, infection, invasion, and inflammation (1). As such, pro-inflammatory cytokines play a critical role in diseases with an underlying maladaptive inflammatory pathology (2). For example, cytokines such as interferon gamma (IFN $\gamma$ ), interleukin 1 beta (IL1 $\beta$ ), and tumor necrosis factor alpha (TNF $\alpha$ ) can drive Beta ( $\beta$ ) cell dysfunction, damage, and death in diabetes mellitus (3, 4). This can potentially occur via pro-inflammatory cytokine-induced activation of intrinsic cellular signaling pathways, such as the generation of reactive oxygen species (ROS), leading to oxidative stress, or the accumulation of misfolded proteins, leading to endoplasmic reticulum (ER) stress (5-9). Furthermore, feedback amplification loops of cytokine signaling have been shown to further attract more innate immune cells and augment the innate immune response (10, 11). These pathways are important mediators of disease not only in islet injury observed in diabetes but also in tissue injury caused by inflammation, rendering pro-inflammatory cytokines crucial mediators and aggravators of many disease states.

Because pro-inflammatory cytokines play an essential role in progression of diabetes, cytokines are often used by supplementing cell culture media with a cytokine cocktail consisting of one or more cytokines to mimic a natural inflammatory environment *in vitro* (12, 13). *In vivo* studies of cytokine expression either inject cytokines into the tail vein or intraperitoneally to induce a whole body overexpression (14) or inject cytokines into tissues of interest such as the pancreatic duct (15). However, approaches utilizing cytokine cocktails *in vivo* have several limitations, including the inability for tissue specific cytokine expression and the inability to precisely titrate the level of induction of the cytokines. These limitations have been partially addressed by transgenic animal models. For instance, a transgenic mouse model of endotoxin-responsive TNF $\alpha$  expression *in vivo* exists (16), although it does not offer tissue specificity. Another transgenic mouse misexpressing IFN- $\gamma$  has been developed, but it does not allow for conditional regulated expression (17). Similarly, a zebrafish model of *in vivo* IL1 $\beta$  over-expression was recently established (18). However, each of these models constitutively overexpresses the respective cytokine only in  $\beta$  cells and does not offer the versatility to induce expression in other tissues or the ability to titrate expression levels.

Since nearly 70% of human disease genes have a functionally similar homologue in the zebrafish, *Danio rerio*, it serves as a robust vertebrate model system in which to study conserved aspects of disease, while taking advantage of powerful attributes as an experimental system (19). Furthermore, zebrafish are used to study diseases with an inflammatory component, such as diabetes, making them useful for studying pro-inflammatory cytokine signaling and their downstream effects (19). Specifically, the conserved aspects of zebrafish innate immune responses relative to mammalian systems, together with the ease of genetic manipulation of the model system makes the zebrafish a powerful *in vivo* model for studying the effects of excessive cytokine induction (20). To date, no models of tissue specific, titratable pro-inflammatory cytokine induction in the zebrafish have previously been reported. In this study, we have

developed a Cre-Enabled Tetracycline Inducible transgenic system for tissue specific cytokine expression (CETI-PIC3) of IFN $\gamma$ , TNF $\alpha$ , and IL1 $\beta$ . We demonstrate the utility of this versatile system to study the downstream effects of cytokine induction, which can be used to study multiple disease states and pathologies, using  $\beta$  cell specific CETI-PIC3 fish as a proof of principle.

## B. Methods/Materials

### Zebrafish Husbandry and Strains

All animal work was approved by the Indiana University School of Medicine Institutional Animal Care and Use Committee (IACUC) and carried out in accordance with IACUC standards. Zebrafish (*Danio rerio*) embryos were spawned and raised under standard laboratory conditions at 28.5°C. To generate the CETI-PIC3 line, a Gibson assembly approach was followed using multiple vector components. A PIC3 (pro-inflammatory cytokines:3) expression cassette comprised of zebrafish mRNA sequences for the cytokines IFN $\gamma$  (NCBI: NM\_212864.1), TNF $\alpha$  (NCBI: NM\_212859.2), and IL1 $\beta$  (NCBI: NM\_212844.2) that were connected with intervening E2A sequences was ordered as a single cDNA g-block from IDT (sequence provided in supplement). High fidelity DNA polymerase was used to PCR amplify the PIC3 cassette with flanking arms that were homologous to the pInducer lentiviral vector (Addgene plasmid #44012). Additionally, sequence for H2B-GFP was similarly PCR-amplified from the plasmid 'hsp70l-loxP-mCherry-STOP-loxP-H2B-GFP\_cryaa-cerulean' (21) (Addgene plasmid #24334) using primers with flanking homology arms. These amplicons for PIC3 and for H2B-GFP were ligated into the multiple cloning site (MCS) of the pInducer lentiviral vector using Gibson assembly master mix (NEB E2611) with the H2B-GFP lying downstream of the PIC3 cassette. The *ubiquitin* promoter sequence (22) and the sequence for the loxP-mCherry-stop-loxP cassette (Addgene plasmid #24334) were similarly PCR-amplified and cloned into the pInducer lentiviral vector construct between the MCS and the reverse Tetracycline trans-activator (*rtta*) site. The sequence for the final construct (*tre:PIC3-H2B-GFP; ubi:loxP-mCherry-STOP-loxP-rtta*) was confirmed by sequencing of the entire plasmid.

The assembled construct: *tre:PIC3-H2B-GFP-ubi:loxP-mCherry-STOP-loxP* was co-injected with Tol2 transposase mRNA (23, 24) into zebrafish zygotes to generate multiple independent founders which were first screened for ubiquitous mCherry expression and then confirmed for H2B-GFP expression upon Cre-mediated recombination. Founders with successful expression of both mCherry and H2B-GFP were propagated further. Transgenic zebrafish larvae were genotyped by epifluorescence at 96 hpf using a Leica M205FA dissecting microscope. Five independent founders were identified, with one founder (F0) having better Cre recombination and the most intense RFP expression. This founder was further propagated and all experiments were performed on the progeny of this founder. In addition, the *Tg(ins:cre)*<sup>s924</sup> established transgenic line was used (21, 25). In addition to cre, this line contains an expression cassette comprised of an  $\alpha$ -crystallin promoter driving a Venus fluorescent protein; this enables visual genotyping of the line at 48 hpf via fluorescence in the lens. All embryos were collected at spawning and maintained in a 28.5°C incubator in egg water-filled petri dishes.

## Chemical Treatments

1-Phenyl-2-thiourea (PTU; Acros #207250250) supplementation at 0.003% was used to prevent pigmentation in all embryos after gastrulation stages. To determine ideal and reproducible conditions, doxycycline (Sigma # 24390-14-5) solutions of 0.5 µg/ml, 1 µg/ml, 2.5 µg/ml, 5 µg/ml, 10 µg/ml and 20 µg/ml were prepared in egg water (0.1% instant ocean salt, 0.0075% calcium sulfate) that was supplemented with PTU. Some transgene induction was observed at all concentrations ranging from 0.5 µg/ml to 20 µg/ml. Embryos treated with 5 µg/ml of doxycycline displayed induction of the pro-inflammatory cytokines without causing islet disaggregation. All embryos from F0 were treated with 5 µg/ml of doxycycline for these experiments.

## Immunofluorescence staining and image collection

At the conclusion of each treatment, larvae were washed in egg water then fixed with 3% formaldehyde in a PEM buffer (0.21 M PIPES, 1 mM MgSO<sub>4</sub>, 2 mM EGTA, and pH 7) at 4°C overnight. Fixed larvae were washed with PBS and de-yolked, then antibody staining was performed as described (26). The following primary antibodies were used: mouse anti-TNFα (1:50; Abcam # 52B83), 1:200 guinea pig anti-insulin (Invitrogen #180067), 1:50 rabbit anti-glucagon (Sigma #SAB4200685), and rabbit anti-cleaved caspase 3 (1:100; Cell Signaling Technologies #9661S). Primary antibodies were detected with 1:500 dilutions of complementary Alexa-conjugated secondary antibodies (Jackson ImmunoResearch). After staining, larvae were mounted on slides in VECTASHIELD (Vector Labs H-1000), and confocal imaging was performed with a Zeiss LSM700 microscope. The confocal stacks of pancreatic islets were analyzed with NIH Fiji software. For the macrophage infiltration analysis, GFP+ cell quantification was carried out within single plane optical sections. Macrophages were manually classified as "infiltrating" if they were within the islet, and "surveilling" if they were observed within a 100 µm radius extending from the center of the islet.

## Quantitative real-time PCR

RNA isolation and reverse transcription was performed using miRNeasy and miScript II RT kits according to the manufacturer's instructions (Qiagen). Quantitative real-time PCR (qRT-PCR) was performed using the miScript SYBR Green PCR Kit (Qiagen) and a Mastercycler ep realplex instrument (Eppendorf). Relative RNA levels were established relative to β-actin, using the comparative Ct method (27). RNA primer sequences are listed in supplemental methods Table 1.

## Measurement of Free Glucose

Glucose colorimetric assays (Bio Vision #K686) and glucose oxidase colorimetric assays (Bio Vision #K86) were performed by pulverizing 20 embryos in each group within 500ul of assay buffer as described in (28) and by following manufacturer's instructions. Results were measured using a SpectraMax M5 multiwell plate reader (Molecular Devices). Glucose oxidase catalyzes the oxidation of glucose to hydrogen peroxide and D-glucono-δ-lactone, thus its activity is an indicator of free glucose (29). Glucose oxidase activity was determined by following manufacturer's instructions.

## Statistical analysis

Statistical analyses were performed using GraphPad Prism Version 7.1 (GraphPad Software). The data are presented as the means  $\pm$  standard error of the mean (SEM). Student's *t* tests were used for comparison between the experimental and control groups. One-way ANOVA with Tukey's post-test for multiple comparisons was used when comparing more than two groups. For all analyses, a *p* value of  $\leq 0.05$  was considered significant. To estimate changes in regional macrophage surveillance over time in multiple embryos, we computed the area under the curve (AUC) using Graphpad Prism. This measurement was used to compare macrophage activity in CETI-PIC3-induced vs. un-induced embryos.

## C. Results

### CETI- PIC3: A Cre-Enabled Tetracycline Inducible transgenic system for tissue specific cytokine expression

To study aspects of pathogenesis of pro-inflammatory diseases, we have devised a novel genetic system to induce the expression of pro-inflammatory cytokines in a dose dependent and tissue restricted manner (**Figure 1**). Interferon gamma (IFN $\gamma$ ), tumor necrosis factor alpha (TNF $\alpha$ ), and interleukin 1 beta (IL1 $\beta$ ) are three pro-inflammatory cytokines that are mediators of cellular damage in multiple diseases. The encoding sequences of the zebrafish orthologues of each of these cytokines and a nuclear green fluorescent protein H2B-GFP were linked together with viral 2A elements to form the PIC3 (proinflammatory cytokines 3) cassette that was then cloned downstream of a Tetracycline-dependent promoter (TRE2) to create the CETI-PIC3 line (**Figure 1A**). In this multi-gene expression system (MGES) the three cytokines and a fluorescent cellular indicator are designed to be expressed at similar levels (30, 31). In addition, a mechanism for restricting expression to particular cell types was incorporated into our expression system via Cre-loxP elements (**Figure 1B**). Specifically, a ubiquitin promotor (22) drives the expression of a red fluorescent protein (RFP, mCherry) that is flanked by loxP sequences, generating a ubiquitous red 'baseline' fluorescence throughout the transgenic animal. When CETI-PIC3 fish are crossed to a tissue specific Cre, the recombinase activity excises the RFP and STOP sequences, permitting expression of reverse Tetracycline trans activator (rtTA), and thereby enabling the inducibility component in a tissue specific pattern (**Figure 1C**). Upon subsequent exposure of the transgenic zebrafish to doxycycline, the drug binds and activates rtTA, which consequently drives expression at the Tetracycline-dependent promoter (32). This combination of elements from both the Tet-on and Cre-lox systems with viral 2A sequences permits multigene expression of these three pro-inflammatory cytokines in an inducible and tissue-specific manner (**Figure 1D**). To determine the maximal dosing of doxycycline for transgene induction without toxicity, transgenic CETI-PIC3 animals and control wild type (WT) embryos were incubated with a range of doxycycline doses (0  $\mu$ g/ml-50  $\mu$ g/ml) for varying durations (0 hr-72 hr), and survival curves were plotted (**Figure 1E and 1F**). Lethality was observed at higher doses, but there was no difference between survival of the CETI-PIC3 embryos and WT embryos across all treatment regimens tested; this indicates that the lethality is due to the toxicity of high doxycycline dosing, not leaky Cre-independent expression of rtTA and/or non-

specific PIC3 cassette expression. Next, to confirm that the CETI-PIC3 system is competent to drive the induction of the PIC3 pro-inflammatory cytokine expression cassette in a titratable manner, the levels of IFN $\gamma$ , TNF $\alpha$ , IL1 $\beta$  and H2B-GFP mRNA were measured using quantitative RT-PCR analysis of whole zebrafish larvae. These measurements reflect both transgene-induced cytokine expression and endogenous message. Zebrafish were either treated for 48 hr with varying doses of doxycycline, or with 5  $\mu$ g/ml of doxycycline for varying durations (**Figure 2A**). For this, the *Tg(CETI-PIC3)<sup>iu15</sup>* fish were crossed to *Tg(ins:cre)<sup>s924</sup>* fish to generate doubly heterozygous (ins-CETI-PIC3) experimental embryos. As a control, single heterozygous *Tg(ins:cre)* embryos and single heterozygous CETI-PIC3 embryos were treated identically. In the double transgenics, we measured increased levels of H2B-GFP, IFN $\gamma$ , TNF $\alpha$ , and IL1 $\beta$  that were correlated to doxycycline dose, which ranged from 0 to 5  $\mu$ g/ml (**Figure 2B**). In addition, we measured steadily increasing levels of these four coding sequences at time points progressing from 0 to 12 hours in response to constant dose of 5  $\mu$ g/ml doxycycline (**Figure 2C**). Based on these results, we used a dose of 5  $\mu$ g/ml doxycycline for the remainder of our experiments because it not only enabled a relatively high induction of cytokines, but also permitted embryo survival with 48 hours of treatment. Under these dosing parameters, the levels of all cytokines and H2B-GFP were increased by 5-40 fold in the doxycycline-treated ins-CETI-PIC3 embryos as compared to *Tg(ins:cre)* and CETI-PIC3 controls (**Figure 2D**).

We next checked to ensure that cytokine expression was enabled only in specific tissues. The *Tg(CETI-PIC3)<sup>iu21</sup>* allele was again combined with the *Tg(ins:cre)* line. Here, we observed  $\beta$  cell-specific expression of the cytokine cassette in ins-CETI-PIC3 treated with doxycycline (**Figure 2E**). This was evidenced both by nuclear H2B-GFP expression as well as by TNF $\alpha$  immunostaining within the insulin-positive cells (white arrows).

Lastly, there is the potential for diminished transgene expression in subsequent generations of newly founded transgenic lines generated with the Tol2 transposon system. This may be due to silencing mechanisms (33), or segregation of multiple insertions. To test the robustness of this new line, we examined F3 ins-CETI-PIC3 progeny for TNF $\alpha$  and H2B-GFP expression after doxycycline treatment, and found that inducibility was maintained (**Figure 3A**). Moreover, quantitative RT-PCR demonstrated that the increase in TNF $\alpha$  transcript levels was also preserved in the F3 embryos (**Figure 3B**). To test for multiple segregating alleles in the transgenic line, heterozygous CETI-PIC3 fish were crossed to wild type fish and the percentage of transgenic embryos was quantified in each generation through F3 (**Figure 3C**). No differences were observed between the generations. Lastly, we compared the efficiency of labeling beta cells with H2B-GFP expression in F1 and F3 generations (**Figure 3D**). Again, no differences were observed between the generations.

### **Cytokine induction in ins-CETI-PIC3 embryos leads to increased islet macrophage surveillance and infiltration**

In pathogenic contexts such as diabetes, the maladaptive expression of cytokines is associated with immune cell infiltration, cellular dysfunction, and cell death. Cytokine-induced damage has been associated with the recruitment of immune cells such as macrophages to the site of insult (34). Macrophages are an innate immune cell type that not only secrete cytokines but are also very responsive to cytokine signaling (35). To visualize the effects of cytokine induction on macrophage recruitment to the site of insult in ins-CETI-PIC3 embryos, we used the *Tg(mpeg:GFP)* transgenic line in which macrophages are marked by green fluorescence (36) (**Figure 4A-4B**). In the doxycycline-induced triply heterozygous embryos, we quantified surveilling macrophages that were within a 100  $\mu$ m radius of the islet (**Figure 4C**). We observed an increase in the number of these surveilling macrophages within the islet region beginning at the 3 hour timepoint after the addition of doxycycline. Furthermore, infiltrating macrophages, usually absent from this region in control islets, appeared in the islet in a time-dependent manner after doxycycline treatment of ins-CETI-PIC3 embryos as compared to treated *Tg(ins:cre)* clutch-mate controls (**Figure 4D**).

### **Cytokine induction in ins-CETI-PIC3 embryos leads to oxidative and ER stress and hyperglycemia**

Signaling through IL1 $\beta$ , TNF $\alpha$ , and IFN $\gamma$  pathways can lead to downstream activation of cellular stress pathways. Reactive oxygen species (ROS) are regulators of inflammatory signaling and can mediate downstream proteasome activity, antioxidant gene transcription, cytokine secretion, and inflammasome activation (37). Consistent with increased generation of ROS, the mRNA levels of Nuclear Factor Erythroid 2-Related Factor 2 (*nrf2a*), Nitric Oxide Synthase 2 (*nos2b*), Heme Oxygenase (*hmox1*), Glutathione Peroxidase (*gpx1a*) and Superoxide Dismutase (*sod*) are each significantly increased in ins-CETI-PIC3 embryos induced with doxycycline (**Figure 5A**). Furthermore, in many pathological settings, inflammation can result in sustained activation of the unfolded protein response (UPR) and trigger endoplasmic reticulum (ER) stress, exacerbating impacts of the inflammatory cascade (38). Consistent with activation of ER stress signaling, we measured increased expression of the ER stress markers Binding Immunoglobulin Protein (*bip*) and C/EBP homologous protein 3 (*chop*) in induced ins-CETI-PIC3 embryos after exposure to doxycycline (**Figure 5B**).

### **Cytokine induction leads to $\beta$ cell dysfunction and death in ins-CETI-PIC3 embryos.**

Sustained or high dose inflammatory cytokine induction in  $\beta$  cells can result in apoptosis (39). Indeed, the observed increase in islet macrophage recruitment is consistent with increased  $\beta$  cell death due to cytokine expression. To determine if  $\beta$  cell death was induced, we used immunostaining for cleaved caspase 3 (Casp3\*) to directly visualize apoptotic cells (40). We found that ins-CETI-PIC3 embryos exhibited a substantial increase in the quantity of Casp3\*-positive cells within the islet (**Figure 5C,D**). Importantly, Casp3\* staining was confined to the Insulin-positive  $\beta$  cells. Consistent with  $\beta$  cell loss, we also observed a decrease in total Insulin<sup>+</sup> cell counts in the ins-CETI-PIC3 embryos (**Figure 5E**).

Previous studies have demonstrated that the induction of pro-inflammatory cytokines in  $\beta$  cells can cause systemic hyperglycemia as well as  $\beta$  cell death (41, 42). We measured free glucose levels in ins-CETI-PIC3 embryos and *Tg(ins:cre)* controls that were treated with 5  $\mu$ g/ml of doxycycline for 48 hours and found that induction of pro-inflammatory cytokines in the  $\beta$  cells indeed resulted in hyperglycemia (**Figure 5F**). To independently confirm hyperglycemia in these ins-CETI-PIC3 animals, we also measured glucose oxidase enzymatic activity. Consistent with our free glucose measurements, glucose oxidase activity was elevated in ins-CETI-PIC3 animals relative to *Tg(ins:cre)* clutch-mate controls (**Figure 5G**). Hyperglycemia can result from either  $\beta$  cell dysfunction or death (43). To determine if cytokine induction in our model could produce a hyperglycemic/dysfunctional phenotype without overt  $\beta$  cell death, we titrated the dose of doxycycline and stained for Casp3\*. In **Figure 6A-B**, we show that animals treated with 0.5, 1, and 2.5  $\mu$ g/ml of doxycycline showed hyperglycemia without an associated increase in Casp3\* expression in these embryos.

Although this ins-CETI-PIC3 gene expression system drives cytokine induction in a tissue-specific manner, as evidenced above, cytokine expression and activity may not be limited to solely the  $\beta$  cells after induction for 48 hours. As seen in **Figures 2E and 3A**, TNF $\alpha$  expression was increased within  $\beta$  cells but was not limited to them. To assess whether a non-autonomous “bystander effect” is also induced in adjacent cells we stained doxycycline-induced animals with CellRox Deep Red, which is a marker for oxidative stress, which is elevated with inflammatory cytokine signaling (19). We found that the expression of CellRox Deep Red was enriched not only in  $\beta$  cells, but also in cells surrounding the islet (**Figure 6C**).

## D. Discussion

### Mechanism of cell damage by CETI-PIC3 line

Pro-inflammatory cytokines have been shown to play a critical role in the pathophysiology of several diseases and in numerous malignant processes. Although studying the role of pro-inflammatory cytokines is critical in understanding any disease with an underlying inflammatory etiology, the current model systems available to study pro-inflammatory cytokines *in vivo* are lacking. The most recent model generated to study pro-inflammatory cytokines *in vivo* in zebrafish does not allow for inducible control of cytokine expression, only induces a single cytokine IL1 $\beta$ , and only works in a pancreatic  $\beta$  cell specific manner (18). Here, we have developed a versatile tissue-specific and dose dependent model of cytokine induction in an *in vivo* zebrafish system. Phenotyping after induction of cytokine signaling showed increased activation of downstream signaling pathways such as ROS signaling pathways and ER mediated stress pathways. Furthermore, our model exhibited macrophage infiltration into regions of cytokine-mis-expressing cells, consistent with prior work showing that cytokine production by other inflammatory conditions such as diabetes, bacterial infection, and cancer induce innate immune responses such as activation of macrophages and neutrophils (44, 45).

A reinforcing feedback activation loop of cytokine signaling and expression has been previously observed, whereby the levels of pro-inflammatory cytokines are increased, feeding a signaling cascade that subsequently augments the expression levels and activities of the triggering cytokines. For example, cytokines signal to recruit immune cells including macrophages and T cells, which activates these cells, causing them to produce more cytokines (11, 46). The macrophages that are recruited to the site of insult will phagocytose diseased and damaged cells leading to their programmed cell death (47). One of the critical cytokines produced by macrophages is IFN $\gamma$  (48). This may explain the high expression levels of IFN $\gamma$  RNA that were approximately 8 times greater than the expression levels of the other cytokines and H2B-GFP comprising the PIC3 cassette.

The CETI-PIC3 system increases the levels of three pro-inflammatory cytokines (IFN $\gamma$ , TNF $\alpha$ , and IL1 $\beta$ ). These three pro-inflammatory cytokines in combination are elevated in several disease processes such as diabetes, pulmonary tuberculosis, and allograft and xenograft rejection (49-51). However, there are disease processes that do not exhibit an increase in all three cytokines in a stoichiometric manner (1, 2, 52, 53). However, it is understood that there are complex signaling pathways and feedback mechanisms between cytokines in which one cytokine can lead to the expression of another cytokine (54). Furthermore, multiple cytokines across several disease models exert their actions by signaling through common pathways such as the JAK-STAT and the NF $\kappa$ B signaling pathways (55). Here, we sought to develop a system in which we increase levels of three well known cytokines in inflammatory pathology to develop a tool that will allow for a better method to study inflammation and inflammatory diseases.

### **Intricacies of the CETI-PIC3 system**

Our model utilizes a two-part Tet-on system that is composed of a normally inactive Tet transcriptional activator that is activated in the presence of doxycycline, and a minimal promoter that is bound by the activated Tet to induce gene expression. This binary system has two components that are critical for inducing genes of interest: (1) an inducible promoter upstream of the genes of interest and (2) a constitutively expressed trans-activator that can be bound by doxycycline to mediate the activation of the inducible promoter. The expression level of the induced genes of interest depends on the strength of the promoter, ubiquitin in this case, that drives the transcriptional activator (56). As there are multiple components in this expression system that must be sequentially transcribed, translated, folded, and processed etc., it is possible that within a given cell there is a slight delay in the expression of the PIC3-GFP cassette as compared to the expression of the Cre or other endogenous markers of that cell type. For instance, the transcription of endogenous insulin and Cre might be expected to initiate simultaneously since they depend on versions of the same promoter. However, before H2B-GFP reporter fluorescence is observable, the stop sequence of the PIC transgene must be excised by Cre, the Tet activator protein must be transcribed, translated, activated, and then translocated to the Tet-response element. This will activate transcription of PIC3-H2B-GFP, which finally will be translated and processed. A relative delay, while not necessarily dependent on distance between the components of the transgene, would need to be empirically determined. However, the presence of insulin<sup>+</sup> cells that are not H2B-GFP<sup>+</sup> after induction is consistent with such a delay.

### **Utility of CETI-PIC3 zebrafish system as a disease model**

The use of this CETI-PIC3 model system to induce expression of pro-inflammatory cytokines in cells of the pancreatic islet to study both type 1 and type 2 diabetes is apparent. However, pro-inflammatory cytokines are important in the pathophysiology of many diseases such as atherosclerosis, inflammatory bowel disease, cardiovascular disease, nephritis, sepsis, cancer, and arthritis to name a few. This CETI-PIC3 system can be used to study aspects of inflammatory disease for which an appropriate tissue-specific Cre is available. Alternatively, some diseases such as sepsis have systemic inflammation and this model can be crossed to a ubiquitous Cre to study whole body inflammation. Some diseases such as obesity have also been shown to have systemic low levels of cytokine elevations. To model such diseases, low concentrations of doxycycline could be used to generate chronic cytokine induction.

Zebrafish have several advantages over rodents as model organisms for studying cytokine induction. The optical transparency of zebrafish along with its short life cycle allows for observation of the zebrafish non-invasively over time. This model is very flexible due to the added possibility of precisely modulating cytokine induction using doxycycline dosing and timing. This flexibility will facilitate future drug discovery and testing in conjunction with other zebrafish models that have previously been used for drug screening (28). In conclusion, our work validates a novel zebrafish system for cell specific pro-inflammatory cytokine activation. This system has widespread applicability for future works requiring tissue-specific study of pro-inflammatory diseases.

### **E. Acknowledgments**

The research was initially conceived by RMA. SI and RMA designed experiments and analyzed the data. SI, RMA, AWH, IH, performed the experiments. SI and RMA wrote the manuscript. ES and RM edited the manuscript. The authors would like to thank Abhishek Kulkarni and members of the Mirmira and Sims laboratories for helpful discussions and comments on the manuscript, and Cody Sorrell for technical assistance and zebrafish husbandry. The authors each declare that they have no competing interests, financial or non-financial. Further, the authors will make materials, data and associated protocols promptly available to readers without undue qualifications in material transfer agreements.

## F. References

1. J. M. Zhang, J. An, Cytokines, inflammation, and pain. *Int Anesthesiol Clin* **45**, 27-37 (2007).
2. C. A. Dinarello, Proinflammatory cytokines. *Chest* **118**, 503-508 (2000).
3. E. Hatanaka, P. T. Monteagudo, M. S. Marrocos, A. Campa, Neutrophils and monocytes as potentially important sources of proinflammatory cytokines in diabetes. *Clin Exp Immunol* **146**, 443-447 (2006).
4. P. Dandona, A. Aljada, A. Bandyopadhyay, Inflammation: the link between insulin resistance, obesity and diabetes. *Trends Immunol* **25**, 4-7 (2004).
5. K. E. Wellen, G. S. Hotamisligil, Inflammation, stress, and diabetes. *J Clin Invest* **115**, 1111-1119 (2005).
6. M. Y. Donath, S. E. Shoelson, Type 2 diabetes as an inflammatory disease. *Nat Rev Immunol* **11**, 98-107 (2011).
7. J. W. Eriksson, Metabolic stress in insulin's target cells leads to ROS accumulation - a hypothetical common pathway causing insulin resistance. *FEBS Lett* **581**, 3734-3742 (2007).
8. A. Ambade, P. Mandrekar, Oxidative stress and inflammation: essential partners in alcoholic liver disease. *Int J Hepatol* **2012**, 853175 (2012).
9. D. Morito, K. Nagata, ER Stress Proteins in Autoimmune and Inflammatory Diseases. *Front Immunol* **3**, 48 (2012).
10. T. Németh, A. Mócsai, Feedback Amplification of Neutrophil Function. *Trends Immunol* **37**, 412-424 (2016).
11. S. W. Canna, E. M. Behrens, Making sense of the cytokine storm: a conceptual framework for understanding, diagnosing, and treating hemophagocytic syndromes. *Pediatr Clin North Am* **59**, 329-344 (2012).
12. J. R. Weaver *et al.*, Integration of pro-inflammatory cytokines, 12-lipoxygenase and NOX-1 in pancreatic islet beta cell dysfunction. *Mol Cell Endocrinol* **358**, 88-95 (2012).
13. F. Zhang *et al.*, IL-1/TNF-. *Stem Cells Int* **2017**, 1349481 (2017).
14. S. Biesmans *et al.*, Peripheral Administration of Tumor Necrosis Factor-Alpha Induces Neuroinflammation and Sickness but Not Depressive-Like Behavior in Mice. *Biomed Res Int* **2015**, 716920 (2015).
15. I. A. Valdez *et al.*, Proinflammatory Cytokines Induce Endocrine Differentiation in Pancreatic Ductal Cells via STAT3-Dependent NGN3 Activation. *Cell Rep* **15**, 460-470 (2016).
16. J. Keffer *et al.*, Transgenic mice expressing human tumour necrosis factor: a predictive genetic model of arthritis. *EMBO J* **10**, 4025-4031 (1991).
17. N. Sarvetnick *et al.*, Loss of pancreatic islet tolerance induced by beta-cell expression of interferon-gamma. *Nature* **346**, 844-847 (1990).
18. L. F. Delgadillo-Silva *et al.*, Modelling pancreatic  $\beta$ -cell inflammation in zebrafish identifies the natural product wedelolactone for human islet protection. *Dis Model Mech* **12**, (2019).
19. A. A. Kulkarni *et al.*, An. *Oxid Med Cell Longev* **2018**, 1324739 (2018).
20. M. van der Vaart, H. P. Spaik, A. H. Meijer, Pathogen recognition and activation of the innate immune response in zebrafish. *Adv Hematol* **2012**, 159807 (2012).

21. D. Hesselton, R. M. Anderson, M. Beinart, D. Y. Stainier, Distinct populations of quiescent and proliferative pancreatic beta-cells identified by HOTcre mediated labeling. *Proc Natl Acad Sci U S A* **106**, 14896-14901 (2009).
22. C. Mosimann *et al.*, Ubiquitous transgene expression and Cre-based recombination driven by the ubiquitin promoter in zebrafish. *Development* **138**, 169-177 (2011).
23. K. Kawakami, K. Asakawa, A. Muto, H. Wada, Tol2-mediated transgenesis, gene trapping, enhancer trapping, and Gal4-UAS system. *Methods Cell Biol* **135**, 19-37 (2016).
24. K. M. Kwan *et al.*, The Tol2kit: a multisite gateway-based construction kit for Tol2 transposon transgenesis constructs. *Dev Dyn* **236**, 3088-3099 (2007).
25. L. Ye, M. A. Robertson, T. L. Mastracci, R. M. Anderson, An insulin signaling feedback loop regulates pancreas progenitor cell differentiation during islet development and regeneration. *Dev Biol* **409**, 354-369 (2016).
26. L. Ye, M. A. Robertson, D. Hesselton, D. Y. Stainier, R. M. Anderson, Glucagon is essential for alpha cell transdifferentiation and beta cell neogenesis. *Development* **142**, 1407-1417 (2015).
27. S. K. Chakrabarti, J. C. James, R. G. Mirmira, Quantitative assessment of gene targeting in vitro and in vivo by the pancreatic transcription factor, Pdx1. Importance of chromatin structure in directing promoter binding. *J Biol Chem* **277**, 13286-13293 (2002).
28. O. Andersson *et al.*, Adenosine signaling promotes regeneration of pancreatic  $\beta$  cells in vivo. *Cell Metab* **15**, 885-894 (2012).
29. S. Ferri, K. Kojima, K. Sode, Review of glucose oxidases and glucose dehydrogenases: a bird's eye view of glucose sensing enzymes. *J Diabetes Sci Technol* **5**, 1068-1076 (2011).
30. P. de Felipe, M. D. Ryan, Targeting of proteins derived from self-processing polypeptides containing multiple signal sequences. *Traffic* **5**, 616-626 (2004).
31. M. L. Donnelly *et al.*, The 'cleavage' activities of foot-and-mouth disease virus 2A site-directed mutants and naturally occurring '2A-like' sequences. *J Gen Virol* **82**, 1027-1041 (2001).
32. K. L. Meerbrey *et al.*, The pINDUCER lentiviral toolkit for inducible RNA interference in vitro and in vivo. *Proc Natl Acad Sci U S A* **108**, 3665-3670 (2011).
33. M. G. Goll, R. Anderson, D. Y. Stainier, A. C. Spradling, M. E. Halpern, Transcriptional silencing and reactivation in transgenic zebrafish. *Genetics* **182**, 747-755 (2009).
34. G. Arango Duque, A. Descoteaux, Macrophage cytokines: involvement in immunity and infectious diseases. *Front Immunol* **5**, 491 (2014).
35. N. Parameswaran, S. Patial, Tumor necrosis factor- $\alpha$  signaling in macrophages. *Crit Rev Eukaryot Gene Expr* **20**, 87-103 (2010).
36. F. Ellett, L. Pase, J. W. Hayman, A. Andrianopoulos, G. J. Lieschke, mpeg1 promoter transgenes direct macrophage-lineage expression in zebrafish. *Blood* **117**, e49-56 (2011).
37. S. J. Forrester, D. S. Kikuchi, M. S. Hernandez, Q. Xu, K. K. Griendling, Reactive Oxygen Species in Metabolic and Inflammatory Signaling. *Circ Res* **122**, 877-902 (2018).
38. K. Zhang, R. J. Kaufman, From endoplasmic-reticulum stress to the inflammatory response. *Nature* **454**, 455-462 (2008).
39. J. J. Collier *et al.*, Pancreatic  $\beta$ -cell death in response to pro-inflammatory cytokines is distinct from genuine apoptosis. *PLoS One* **6**, e22485 (2011).

40. A. M. Gown, M. C. Willingham, Improved detection of apoptotic cells in archival paraffin sections: immunohistochemistry using antibodies to cleaved caspase 3. *J Histochem Cytochem* **50**, 449-454 (2002).
41. L. A. Berchtold, M. Prause, J. Størling, T. Mandrup-Poulsen, Cytokines and Pancreatic  $\beta$ -Cell Apoptosis. *Adv Clin Chem* **75**, 99-158 (2016).
42. J. Montane, L. Cadavez, A. Novials, Stress and the inflammatory process: a major cause of pancreatic cell death in type 2 diabetes. *Diabetes Metab Syndr Obes* **7**, 25-34 (2014).
43. G. C. Weir, S. Bonner-Weir, Five stages of evolving beta-cell dysfunction during progression to diabetes. *Diabetes* **53 Suppl 3**, S16-21 (2004).
44. J. P. Mizgerd, M. R. Spieker, C. M. Doerschuk, Early response cytokines and innate immunity: essential roles for TNF receptor 1 and type I IL-1 receptor during *Escherichia coli* pneumonia in mice. *J Immunol* **166**, 4042-4048 (2001).
45. F. O. Martinez, A. Sica, A. Mantovani, M. Locati, Macrophage activation and polarization. *Front Biosci* **13**, 453-461 (2008).
46. M. Y. Donath, É. Dalmas, N. S. Sauter, M. Böni-Schnetzler, Inflammation in obesity and diabetes: islet dysfunction and therapeutic opportunity. *Cell Metab* **17**, 860-872 (2013).
47. D. Hirayama, T. Iida, H. Nakase, The Phagocytic Function of Macrophage-Enforcing Innate Immunity and Tissue Homeostasis. *Int J Mol Sci* **19**, (2017).
48. L. Darwich *et al.*, Secretion of interferon-gamma by human macrophages demonstrated at the single-cell level after costimulation with interleukin (IL)-12 plus IL-18. *Immunology* **126**, 386-393 (2009).
49. Y. V. Cavalcanti, M. C. Brelaz, J. K. Neves, J. C. Ferraz, V. R. Pereira, Role of TNF-Alpha, IFN-Gamma, and IL-10 in the Development of Pulmonary Tuberculosis. *Pulm Med* **2012**, 745483 (2012).
50. G. Wachlin *et al.*, IL-1beta, IFN-gamma and TNF-alpha increase vulnerability of pancreatic beta cells to autoimmune destruction. *J Autoimmun* **20**, 303-312 (2003).
51. P. Batten, M. H. Yacoub, M. L. Rose, Effect of human cytokines (IFN-gamma, TNF-alpha, IL-1 beta, IL-4) on porcine endothelial cells: induction of MHC and adhesion molecules and functional significance of these changes. *Immunology* **87**, 127-133 (1996).
52. W. Strober, I. J. Fuss, Proinflammatory cytokines in the pathogenesis of inflammatory bowel diseases. *Gastroenterology* **140**, 1756-1767 (2011).
53. R. N. Monastero, S. Pentyala, Cytokines as Biomarkers and Their Respective Clinical Cutoff Levels. *Int J Inflam* **2017**, 4309485 (2017).
54. W. J. Leonard, J. X. Lin, Cytokine receptor signaling pathways. *J Allergy Clin Immunol* **105**, 877-888 (2000).
55. Z. Zha *et al.*, Interferon- $\gamma$  is a master checkpoint regulator of cytokine-induced differentiation. *Proc Natl Acad Sci U S A* **114**, E6867-E6874 (2017).
56. M. Zabala *et al.*, Optimization of the Tet-on system to regulate interleukin 12 expression in the liver for the treatment of hepatic tumors. *Cancer Res* **64**, 2799-2804 (2004).

# Figures

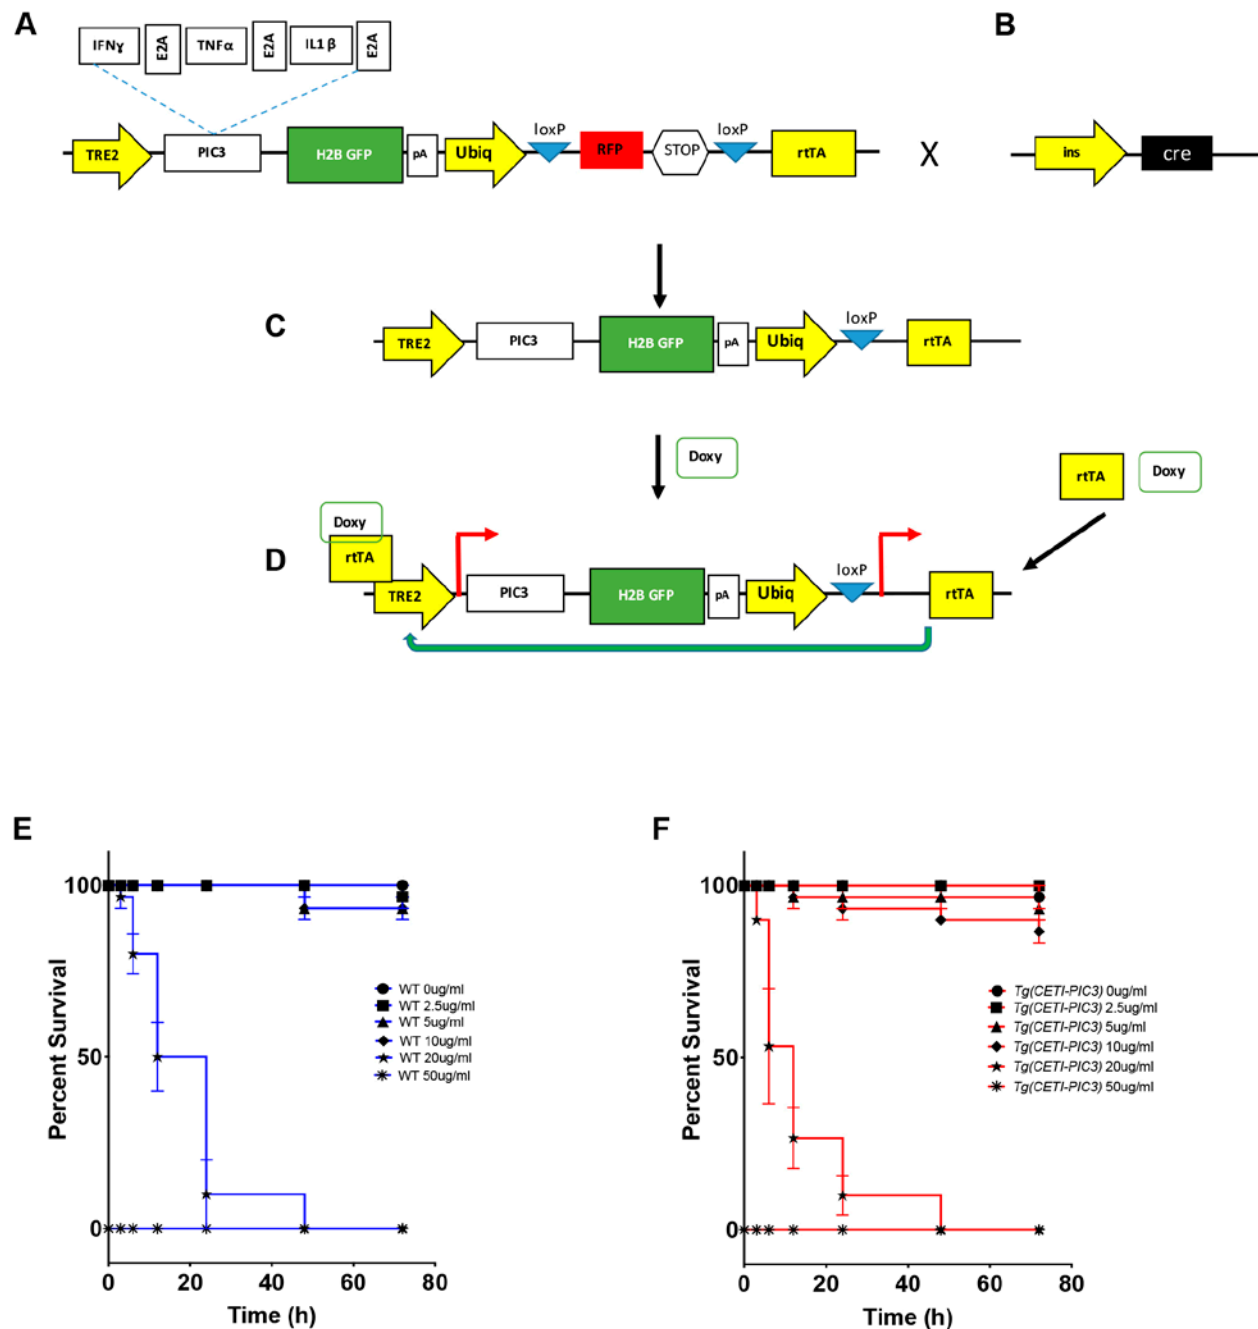

**Figure 1: Design of the CETI-PIC3 line. (A.)** The genetic construct of the CETI-PIC3 line. A tetracycline-on system is used to induce the three cytokines of interest. An H2B-GFP cassette is placed downstream of the cytokines as a marker to visually show that the cytokines have been induced. **(B.)** This model takes advantage of Cre-lox systems to induce cytokines in a tissue specific manner. **(C.)** Any tissue specific promoter driving a Cre cassette can be used to induce tissue specific inflammation in this model after excision of the stop codon downstream of the RFP cassette. **(D.)** When CETI-PIC3 fish are crossed to a tissue specific Cre and subsequently treated with doxycycline, there is

dose dependent induction of the cytokines in a tissue specific manner. **(E.)** Survival curve for wild type embryos treated with different doses of doxycycline (0 µg/ml-50 µg/ml) for different time points (0 hrs-72 hrs). **(F.)** Survival curve for CETI-PIC3 embryos treated with different doses of doxycycline (0 µg/ml-50 µg/ml) for different time points (0 hrs-72 hrs). There is no difference in survival for wild type vs CETI-PIC3 doxycycline treated embryos n=10 embryos per dose/time \*p<0.05.

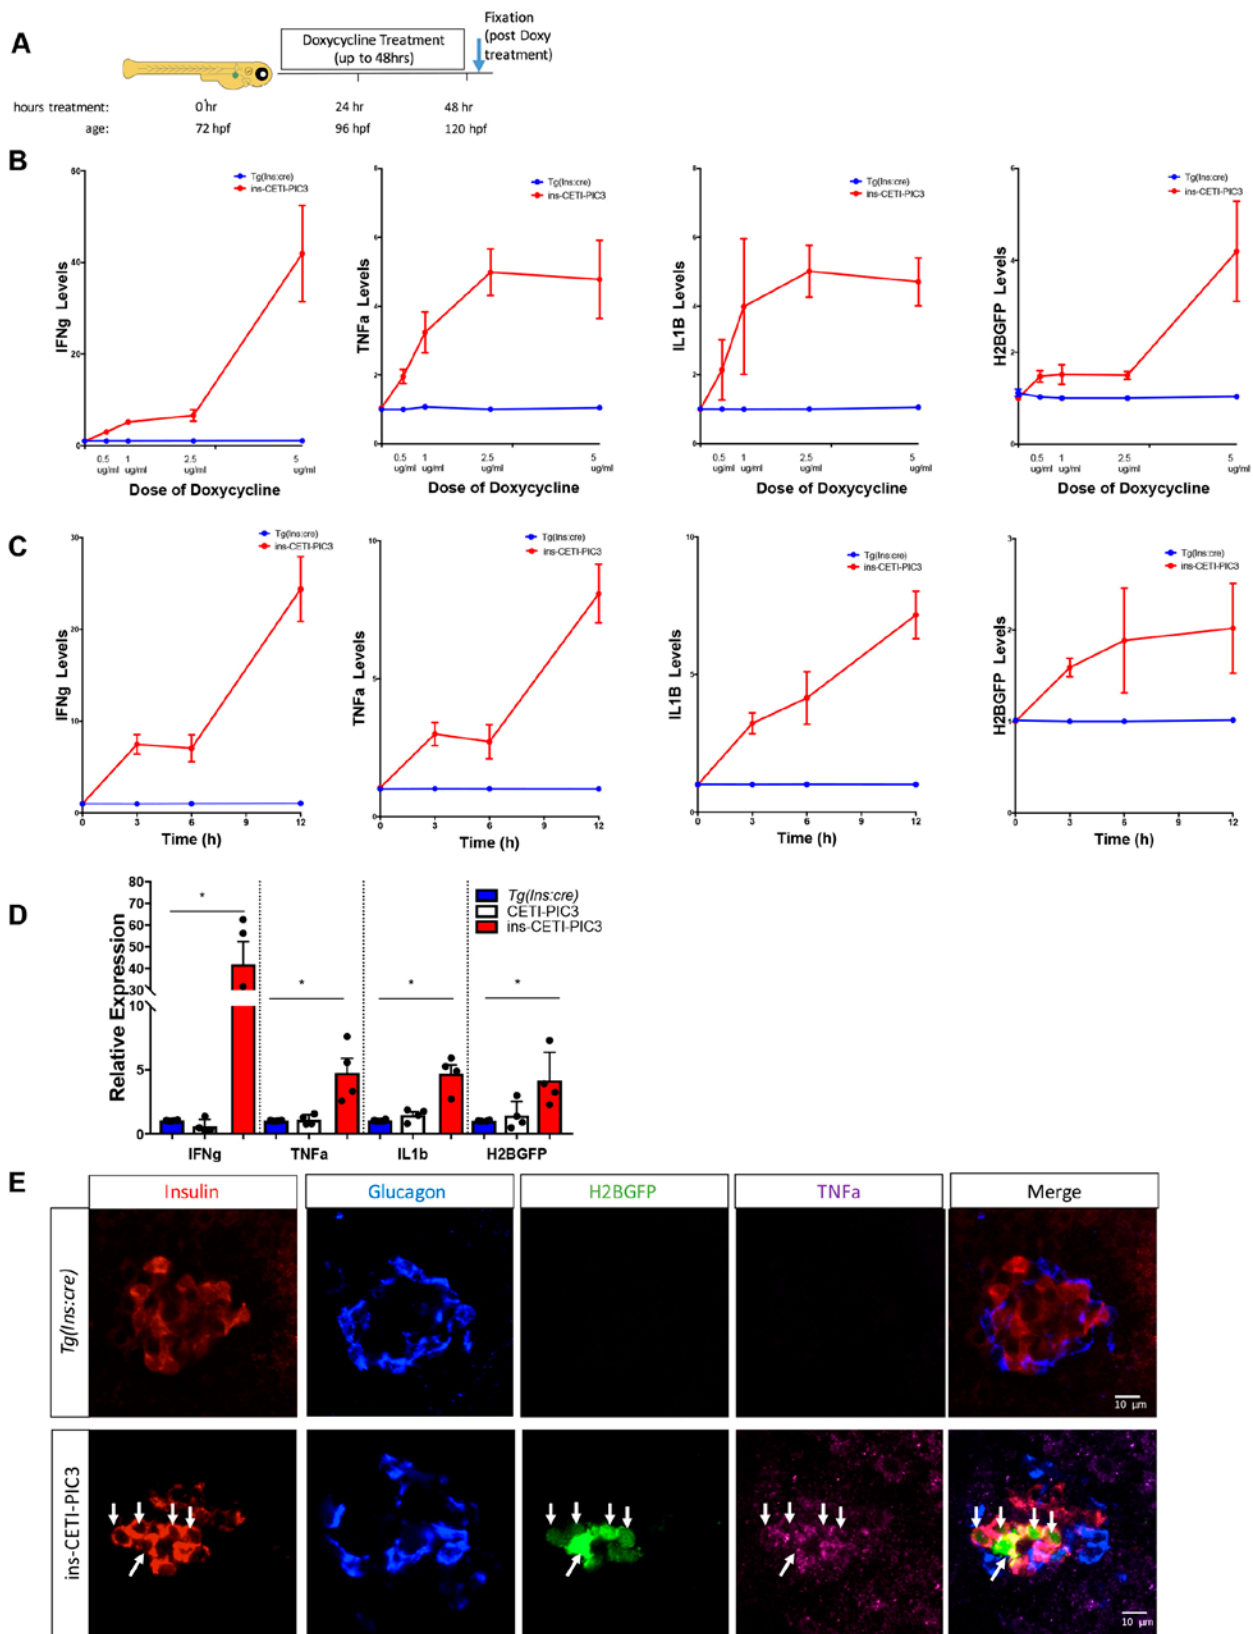

**Figure 2: The transcript levels of cytokines are increased and tissue specific induction of cytokines is achieved within the induced ins-CETI-PIC3 model system.** (A.) The schematic for the experimental procedure is provided. All treatments were performed 72 hours post fertilization. For panels B, C, and D, RNA was subsequently isolated from the whole bodies of at least 15 embryos in each clutch and all analysis was performed on whole body samples. (B.) Dose response to 0, 0.5, 1, and 2.5  $\mu\text{g/ml}$  of doxycycline is shown for  $\text{IFN}\gamma$ ,  $\text{TNF}\alpha$ ,  $\text{IL1}\beta$ , and H2B-GFP. (C.) Time response to 5  $\mu\text{g/ml}$  of doxycycline is shown for up to 12 hours after treatment with doxycycline. All experiments for panels D and E were performed in ins-CETI-PIC3 experimental embryos and clutch-mate control *Tg(ins:cre)* or CETI-PIC3 embryos treated with 5  $\mu\text{g/ml}$  of doxycycline for 48 hours. (D.) The levels of  $\text{IFN}\gamma$ ,  $\text{TNF}\alpha$ ,  $\text{IL1}\beta$ , and H2B-GFP are all increased after doxycycline induction in the ins-CETI-PIC3 embryos as compared to *Tg(ins:cre)* and CETI-PIC3 control embryos  $n=4$   $*p<0.05$ . (E.) After crossing the CETI-PIC3 line to the *Tg(ins:cre)* line,  $\beta$  cell specific induction of the cytokines occurred, as seen by the H2B-GFP signal and  $\text{TNF}\alpha$  staining only in the Insulin positive cells (white arrows).

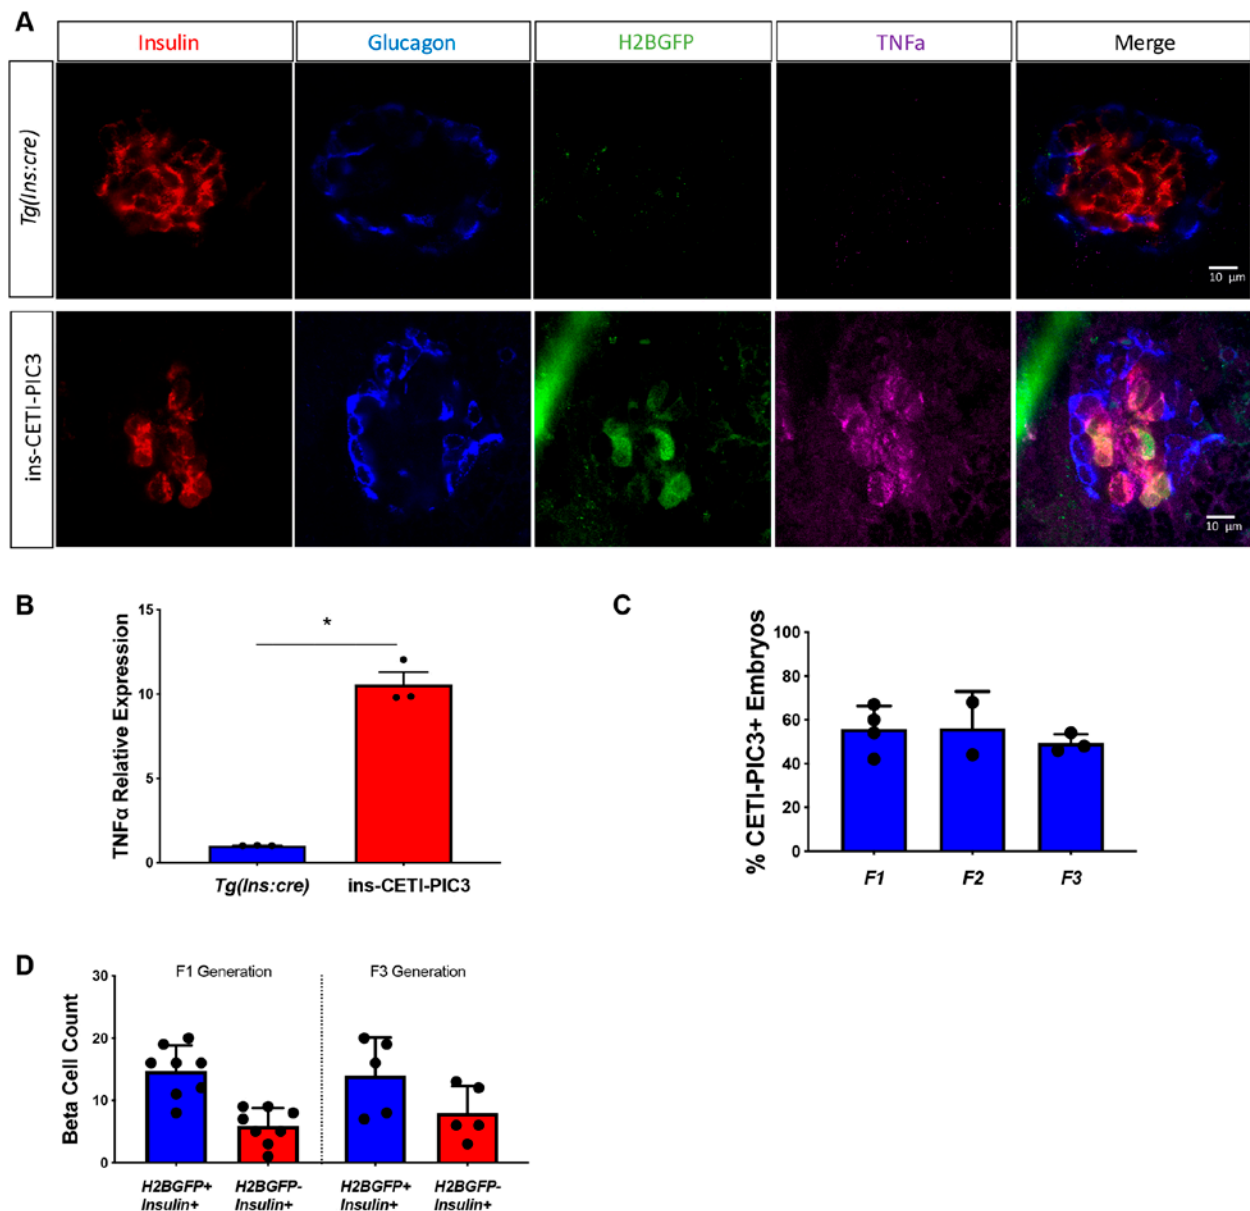

**Figure 3: The efficiency and effects of the CETI-PIC3 system is preserved in subsequent generations.** (A.) Embryos from an F3 generation of the CETI-PIC3 line were crossed to the *Tg(ins:cre)* line.  $\beta$  cell specific induction of H2B-GFP was observed and TNF $\alpha$  staining was enriched within  $\beta$  cells. (B.) qRT-PCR analysis demonstrates increase in TNF $\alpha$  transcript levels in this generation of embryos. (C.) the percentage of transgenic embryos from each generation, up to the F3 generation is provided. (D.) Quantification of Insulin $^{+}$  H2B-GFP $^{+}$  double positive cells and Insulin $^{+}$  H2B-GFP $^{-}$  single positive cells in Ins-CETI-PIC3 embryos from F1 and F3 generations to show how responsive CETI-PIC3 embryos are to *insulin:cre*.

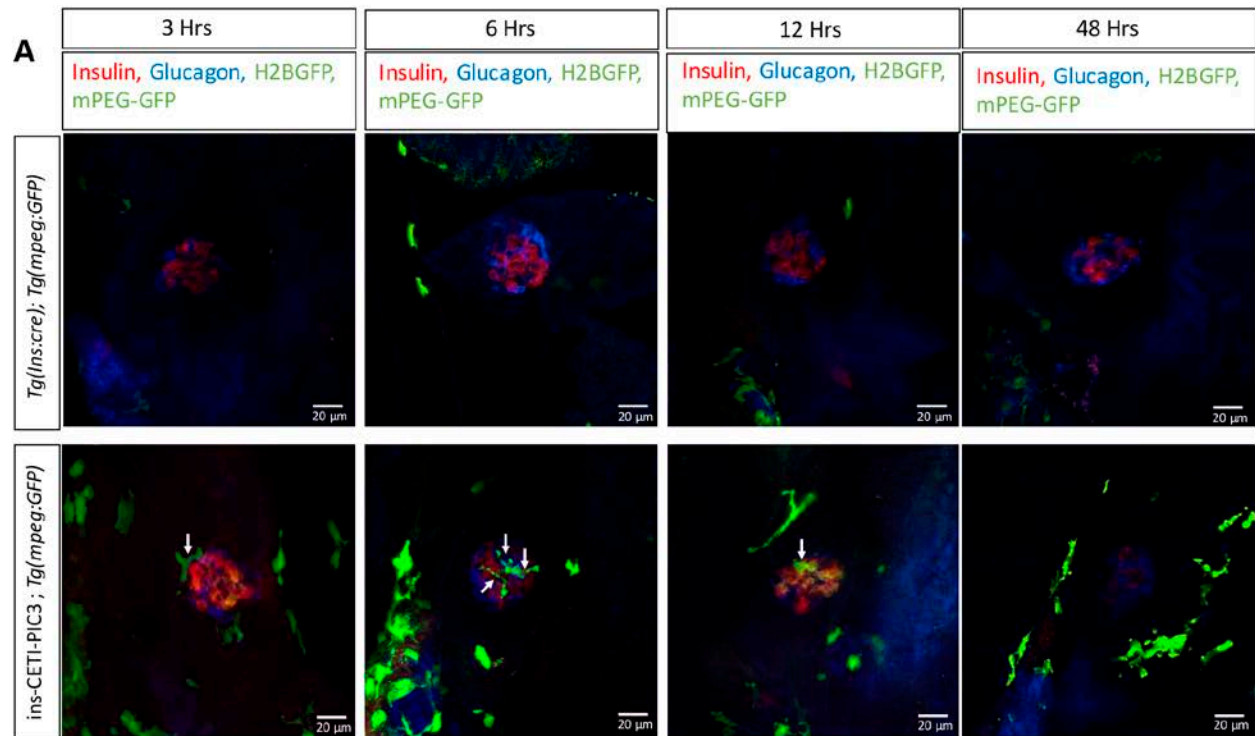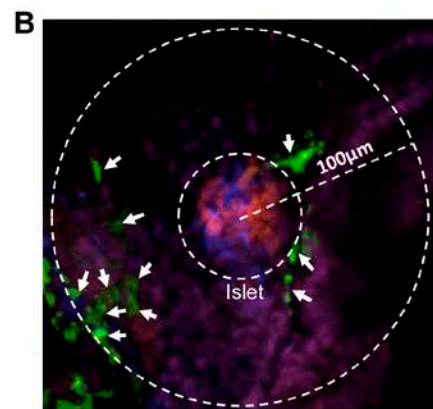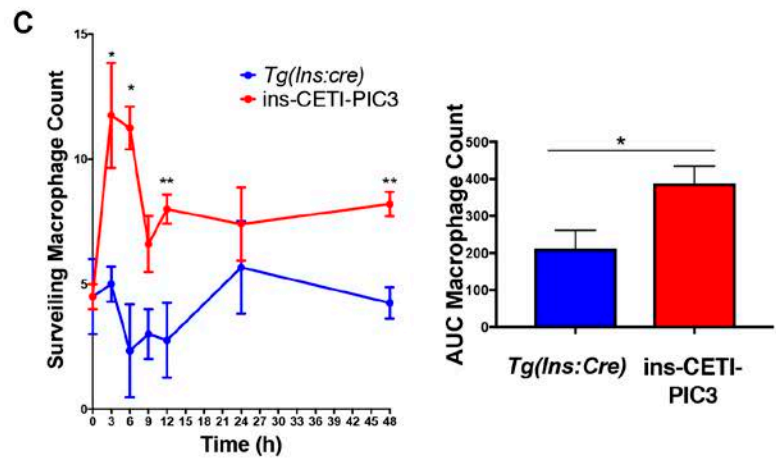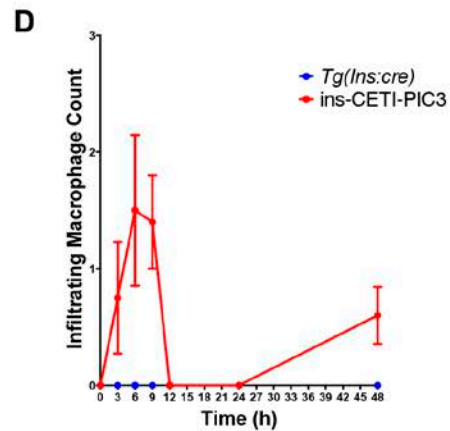

**Figure 4: Cytokine induced embryos have increased macrophage surveillance and infiltration as compared to clutch-mate controls. (A.)** ins-CETI-PIC3 embryos were crossed to the *Tg(mpeg:GFP)* line that marks macrophages with a GFP tag. *CETI-PIC3;ins:cre;Tg(mpeg:GFP)* triple positive embryos were compared to *Tg(ins:cre);Tg(mpeg:GFP)* control embryos. All embryos were treated with 5 µg/ml of doxycycline for different time points (0 hrs-48 hrs). Infiltrating macrophages are marked with white arrows. **(B.)** The schematic for how macrophages were counted is shown here. All macrophages within a 100µm radius of the center of the islet were counted. All macrophages within that radius but outside of the islet itself were considered surveilling macrophages (white arrows) and all macrophages within the islet were considered infiltrating macrophages. **(C.)** ins-CETI-PIC3 embryos display increased surrounding surveilling macrophages in a time dependent manner n=4-5 embryos \*p<0.05. **(D.)** AUC was calculated to quantify macrophage numbers for multiple embryos and showed that increased infiltrating macrophages were observed in ins-CETI-PIC3 embryos in a time dependent manner n=4-5 embryos \*p<0.05.

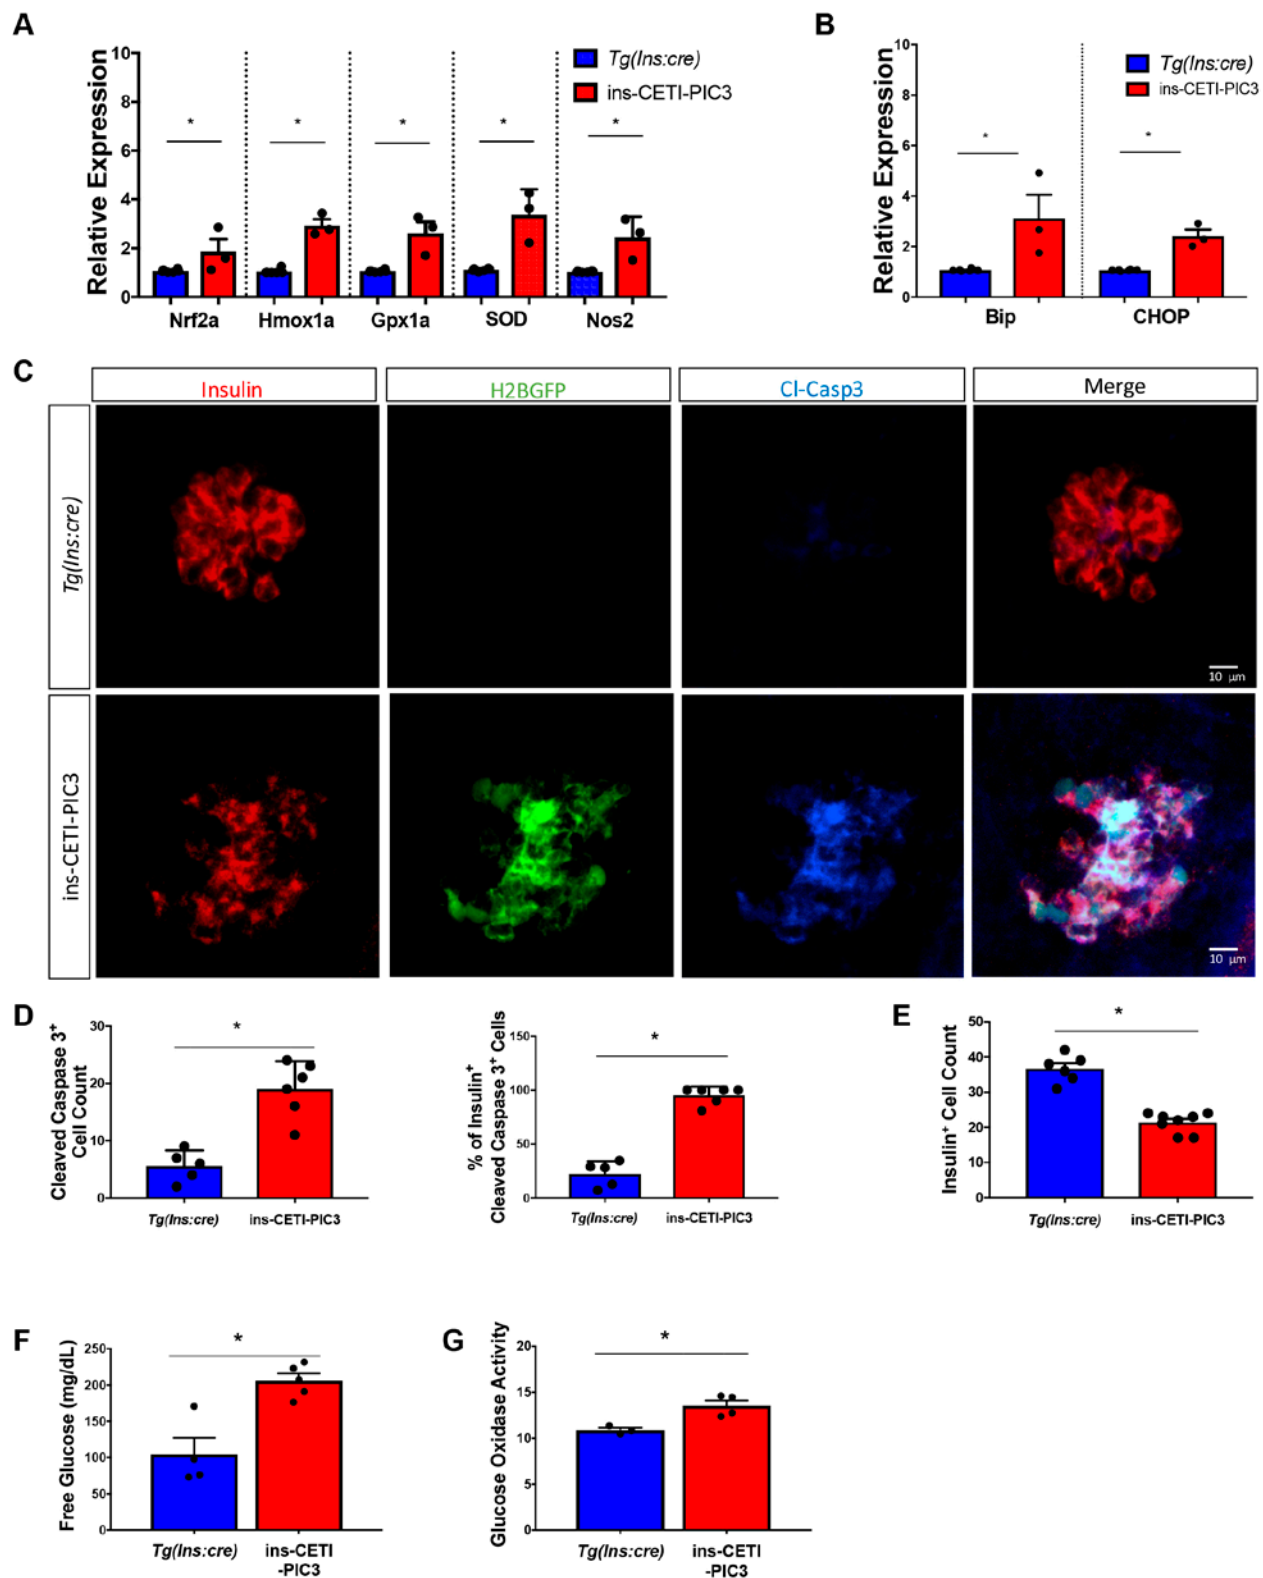

**Figure 5: Cytokine induced embryos display increased transcript levels for markers of ROS mediated and ER stress, increased  $\beta$  cell death, and are hyperglycemic as compared to clutch-mate controls.** All experiments in these panels were performed in ins-CETI-PIC3 experimental embryos and clutch-mate control *Tg(ins:cre)* embryos treated with 5  $\mu$ g/ml of doxycycline for 48 hours. **(A.)** Several members involved in the ROS mediated stress pathway such as *Nrf2a*, *Hmox1a*, *Gpx1a*, *SOD*, and *Nos2* were also increased after induction of the pro-inflammatory cytokines n=3 \*p<0.05. **(B.)** Members of the ER stress pathway such as *BIP* and *CHOP* were increased following cytokine induction n=3 \*p<0.05. **(C.)** There is increased Cleaved Caspase 3 staining in ins-CETI-PIC3 embryos as compared to *Tg(ins:cre)* controls. **(D.)** The number of Cleaved Caspase3<sup>+</sup> cells per islet is increased in the ins-CETI-PIC3 embryos n=6 \*p<0.05. **(E.)** The Insulin<sup>+</sup> cell count is decreased in the ins-CETI-PIC3 embryos. **(F.)** Free glucose levels in ins-CETI-PIC3 embryos are higher as compared to *Tg(ins:cre)* controls n=5 \*p<0.05. **(D.)** Glucose oxidase activity, an indicator of free blood glucose is higher in ins-CETI-PIC3 embryos n=4 \*p<0.05.

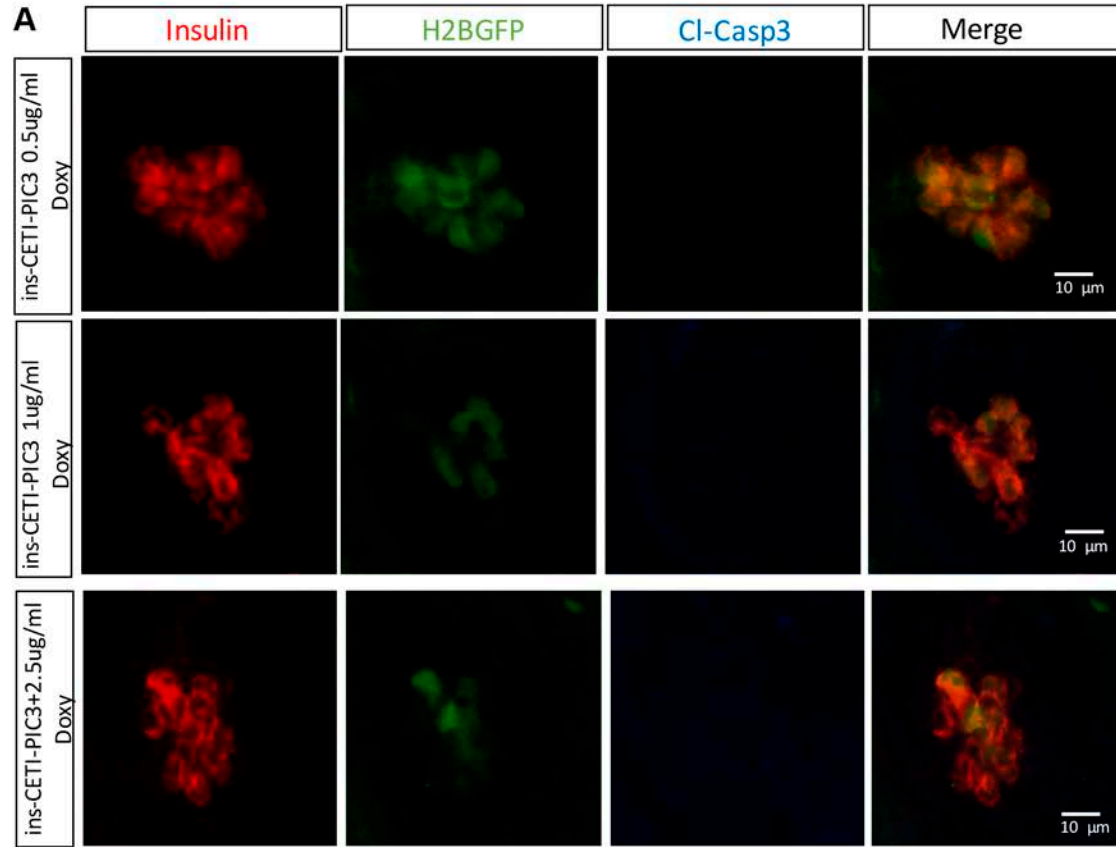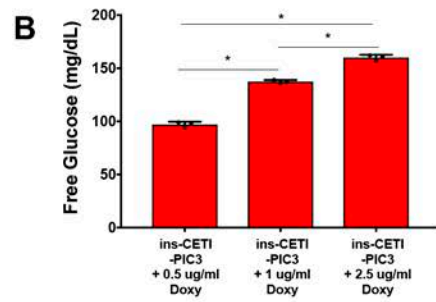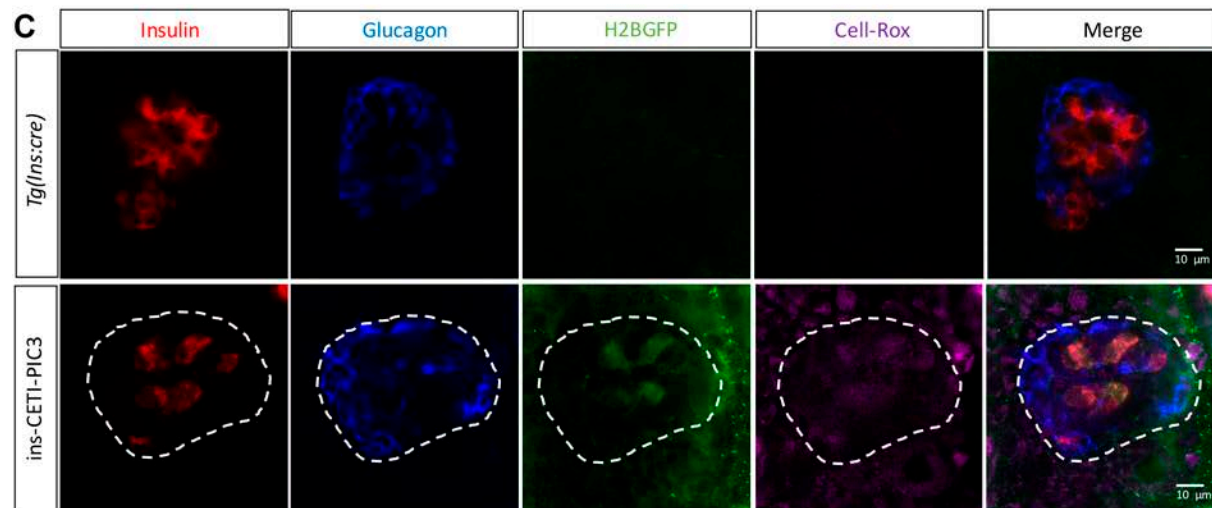

**Figure 6: Hyperglycemia is induced without overt  $\beta$  cell death and ROS mediated stress is seen in surrounding cells of the islet (A.)** After treatment with 0.5, 1, and 2.5  $\mu\text{g/ml}$  doxycycline, there was not a subsequent increase in Casp3\* expression in these embryos. **(B.)** A hyperglycemic phenotype was observed in embryos treated with 1, and 2.5  $\mu\text{g/ml}$  doxycycline. **(C.)** the expression of Cell Rox Deep Red is enriched in  $\beta$  cells and is also observed in surrounding cells of the islet (outlined by dashed line).
